# Supplementary material
Source: PubMed Central journal article supplement (PMC5435468)
Supplement: NIHMS856847-supplement-ESI.pdf [file NIHMS856847-supplement-ESI.pdf]

## Supporting Information: Surfactant-stripped Naphthalocyanines for Multimodal Tumor Theranostics with Upconversion Guidance Cream

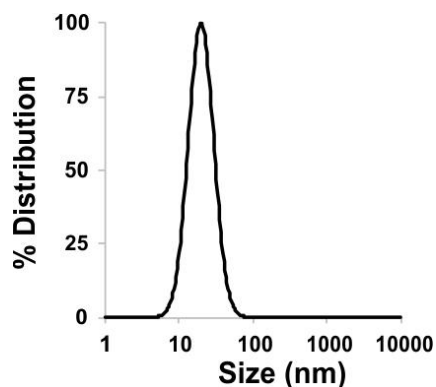

**Supplementary Fig. 1:** Size by volume distribution of ONc nanonaps measured in PBS by dynamic light scattering. The z-average was 29.45 with a polydispersity index of 0.177.

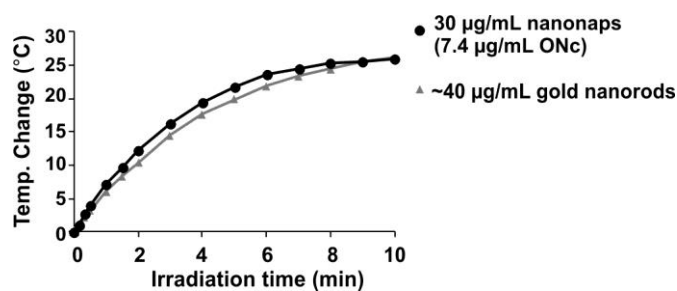

**Supplementary Fig. 2:** Heating comparison of ONc nanonaps and PEGylated gold nanorods with peak absorption at 860 nm. Absorption was matched at 860 nm.

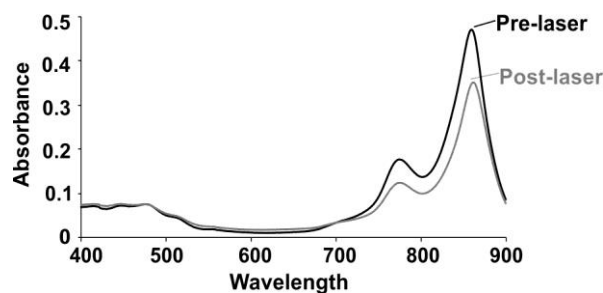

**Supplementary Fig. 3:** Nanonap absorption before and after photothermal heating with an 860 laser diode for 10 minutes at 1500 mW/cm<sup>2</sup> in PBS.

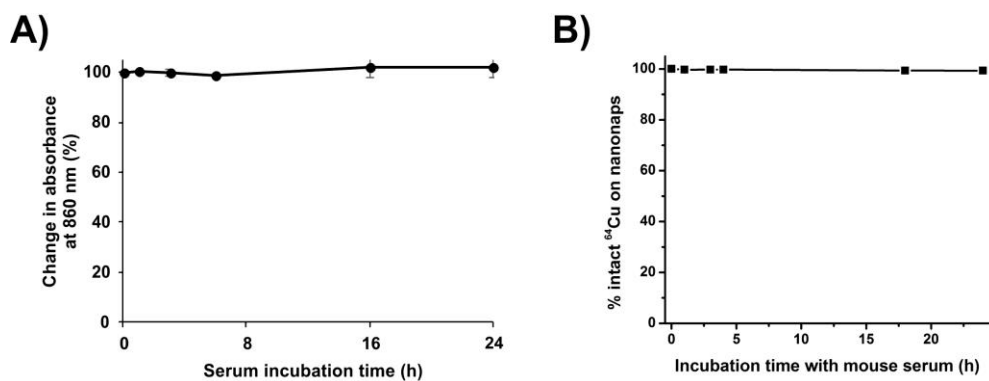

**Supplementary Fig. 4:** Serum stability of nanonaps. A) Absorption stability of nanonaps during incubation 50% adult bovine serum at 37 °C. B) <sup>64</sup>Cu chelation stability of nanonaps during incubation in murine serum at 37 °C.

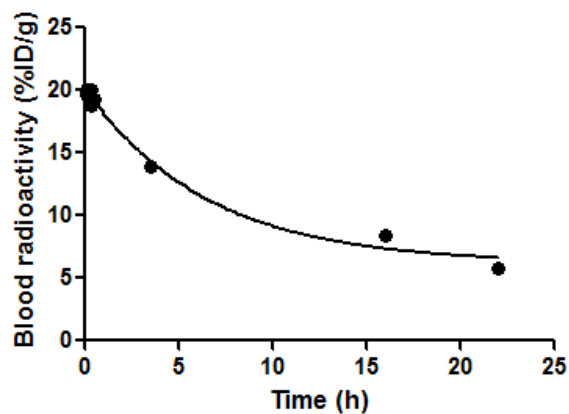

**Supplementary Fig. 5:** Circulation half-life of nanonaps in blood, characterized by measuring radioactivity in blood after intravenous injection.

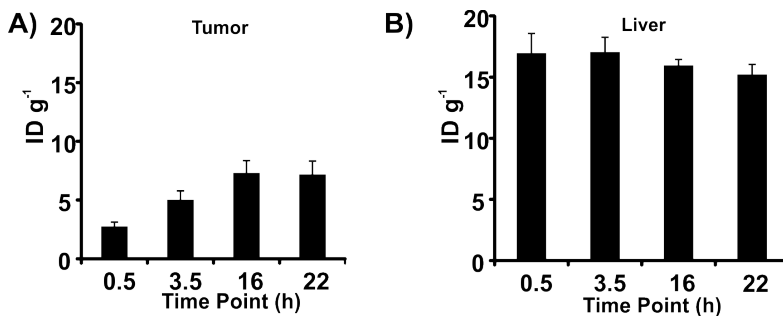

**Supplementary Fig. 6:** Biodistribution of nanonaps in A) tumor and B) liver 24 hours after I.V. injection.

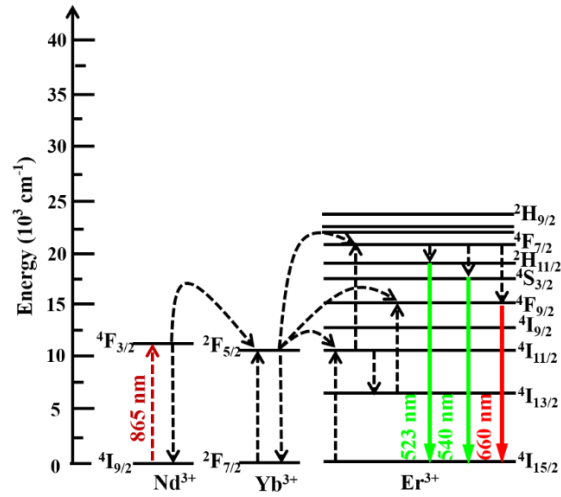

**Supplementary Fig. 7:** Energy level diagram of Nd<sup>3+</sup>, Yb<sup>3+</sup> and Er<sup>3+</sup> ions as well as the proposed up-conversion mechanism for the emission under laser excitation of 860 nm.

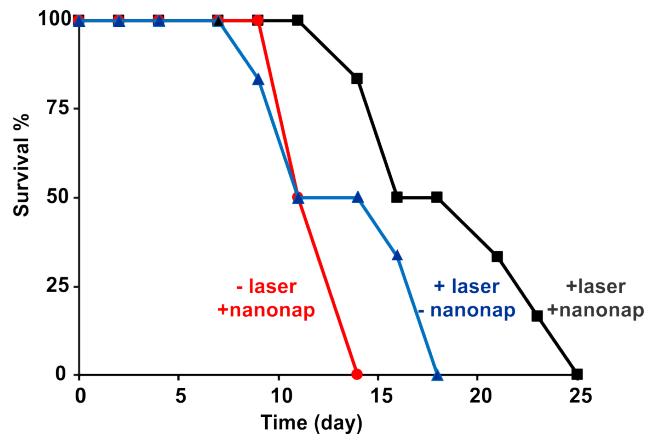

**Supplementary Fig. 8:** Survival curve of 4T1 tumor bearing mice treated with conditions indicated. Mice were euthanized when tumors reached 1000 mm<sup>3</sup>.
